# Supplementary material for: Preparation of quantum dots from MoO3 nanosheets by UV irradiation and insight into morphology changes
Source: Royal Society of Chemistry journal article supplement (doi:10.1039/c6tc04006c), 2016-01-01
Supplement: c6tc04006c1.pdf [file c6tc04006c1.pdf]

## Supporting Information

### Quantum dots preparation from MoO<sub>3</sub> nanosheets by UV irradiation and insight into morphology changes

*Xiaolong Lu,<sup>a</sup> Rongguo Wang,<sup>\*a</sup> Lifeng Hao,<sup>a</sup> Fan Yang,<sup>a</sup> Weicheng Jiao,<sup>a</sup> Jian Zhang,<sup>a</sup> Ping Peng<sup>a</sup> and Wenbo Liu<sup>b\*</sup>*

<sup>a</sup> Center for Composite Materials and Structures, Harbin Institute of Technology, Harbin, 150080, China. Fax: +86-0451-86402399; Tel: +86-0451-86402399; \*E-mail: wrg@hit.edu.cn

<sup>b</sup> School of Materials Science and Engineering, Harbin Institute of Technology, Harbin, 150001, China. \*E-mail: liuwenbo@hit.edu.cn

#### 1. The UV-vis absorption spectra of NMP

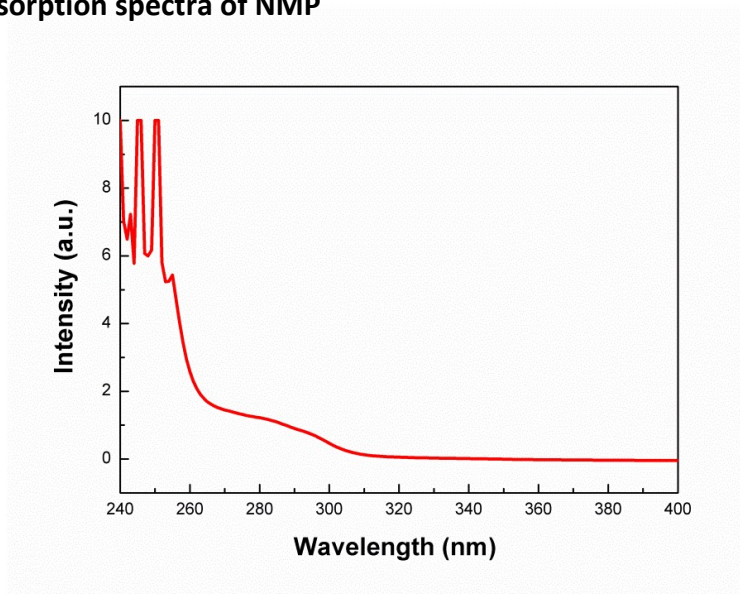

Fig. S1 The UV-vis absorption spectra of NMP. Basically, there is no absorption for NMP at the wavelength of 365 nm.

---

## 2. Controlled study excluding magnetic stirring

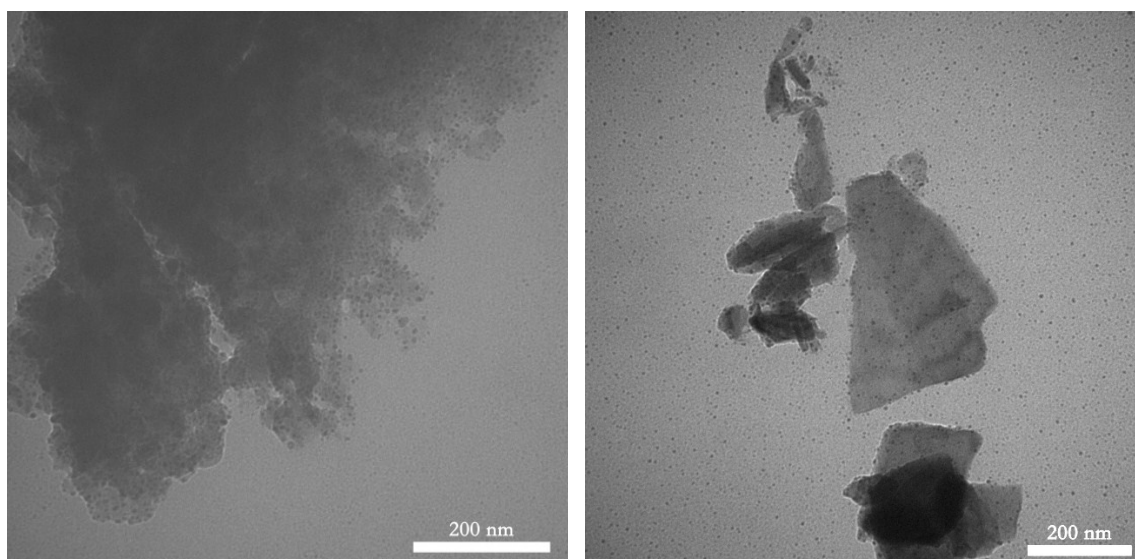

Fig. S2 The TEM images of products obtained in NMP after irradiation for 8 h without magnetic stirring.
